# Supplementary figures and images for: Discovery of therapeutic agents targeting PKLR for NAFLD using drug repositioning
Source: PubMed Central journal article supplement — eBioMedicine. 2022 Aug 18;83:104214. doi: 10.1016/j.ebiom.2022.104214 (PMC9420484; doi:10.1016/j.ebiom.2022.104214), 2022-08-18

Figure S1

## HSDvsChow

## HSDKOvsHSD

Liver

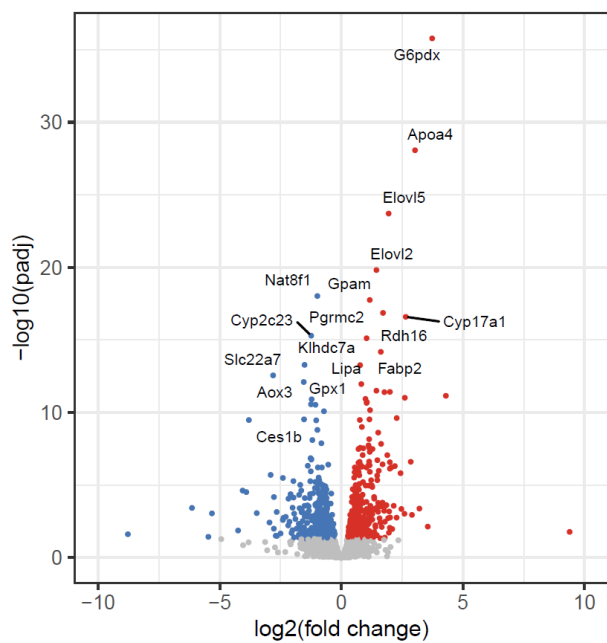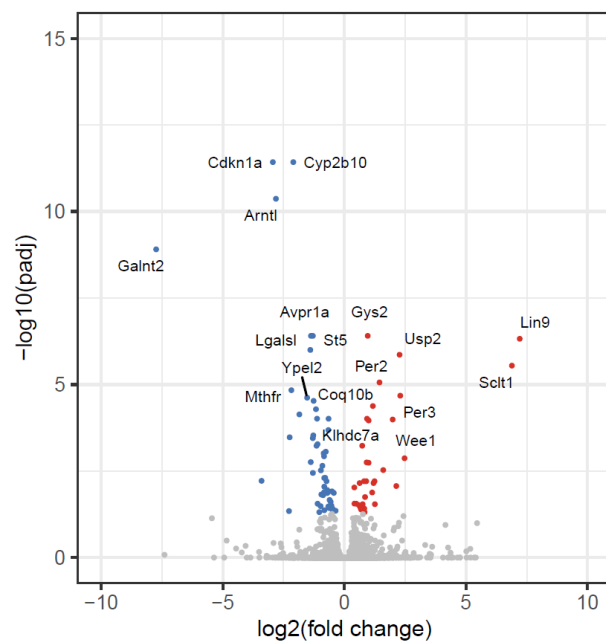

Adipose

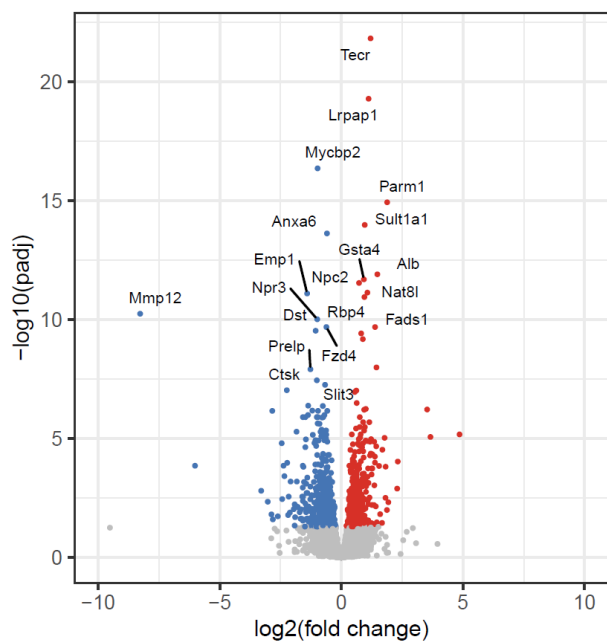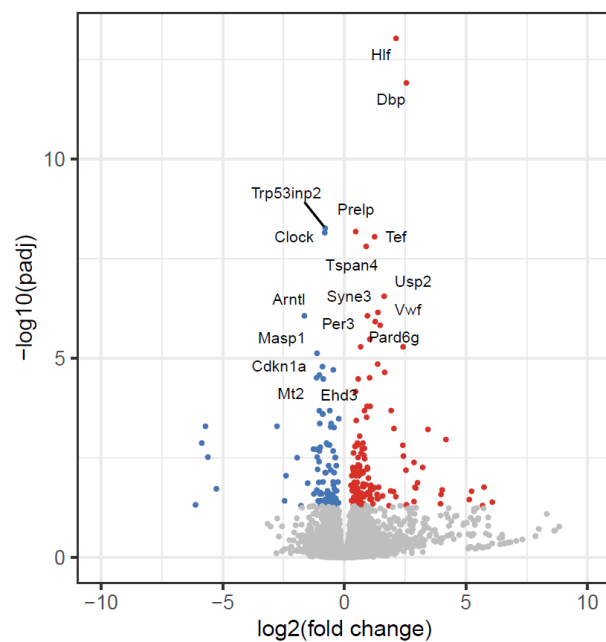

Supplement: mmc2.pdf [file mmc2.pdf]

Figure S2

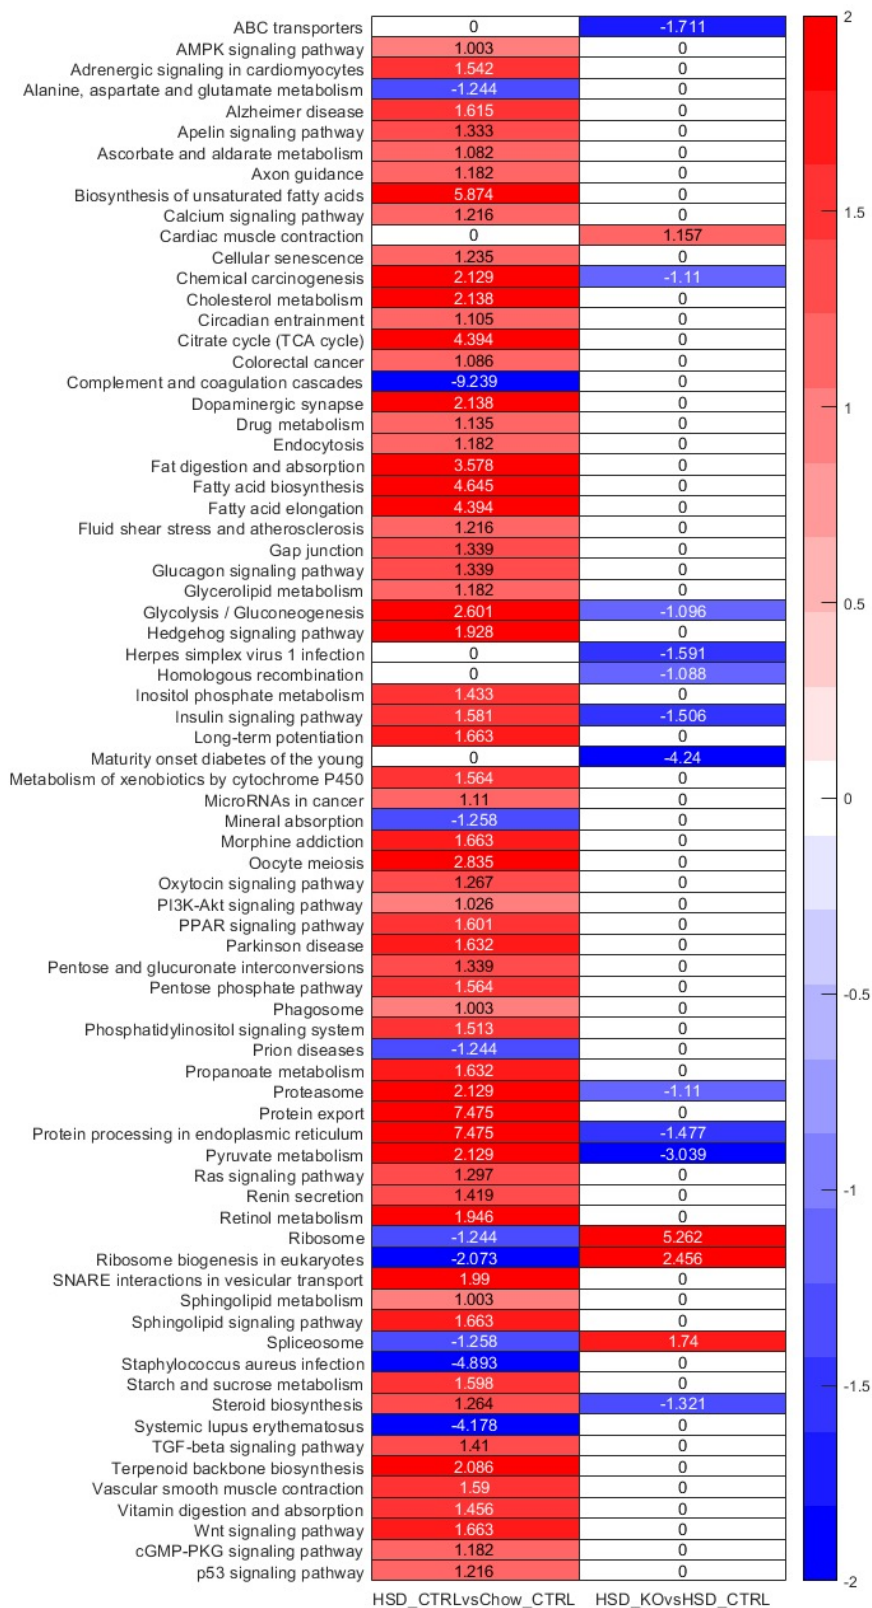

Supplement: mmc3.pdf [file mmc3.pdf]

Figure S3

### HSDvsChow

Muscle

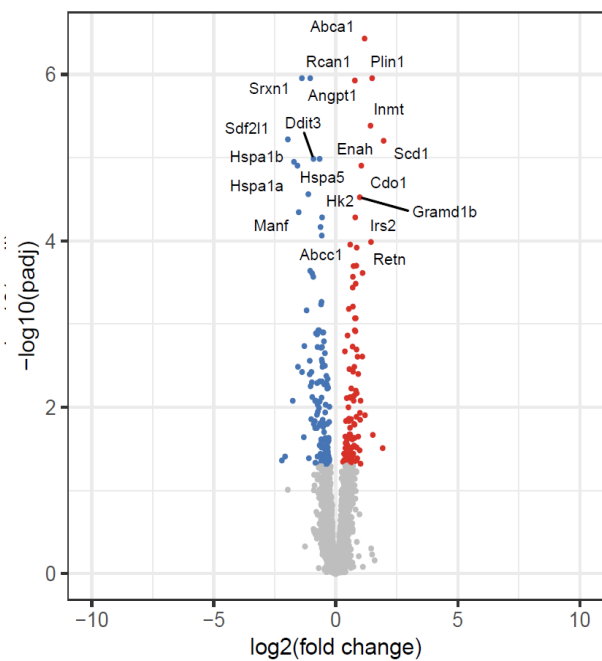

### HSDKOvsHSD

Heart

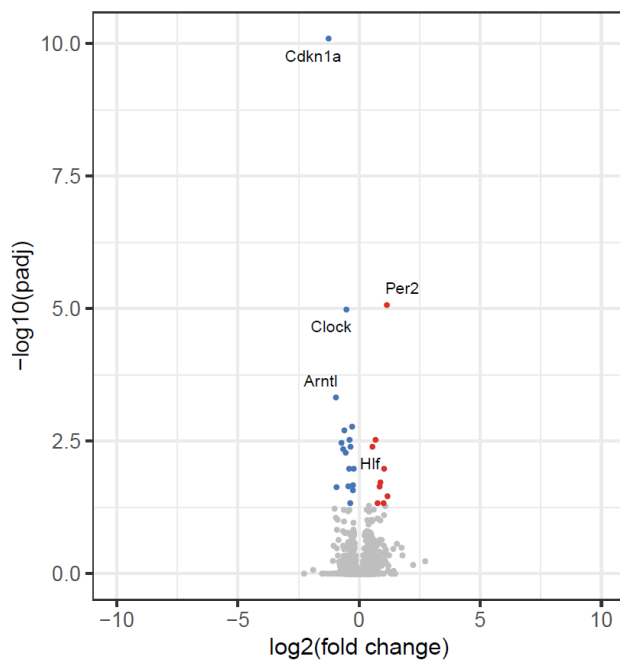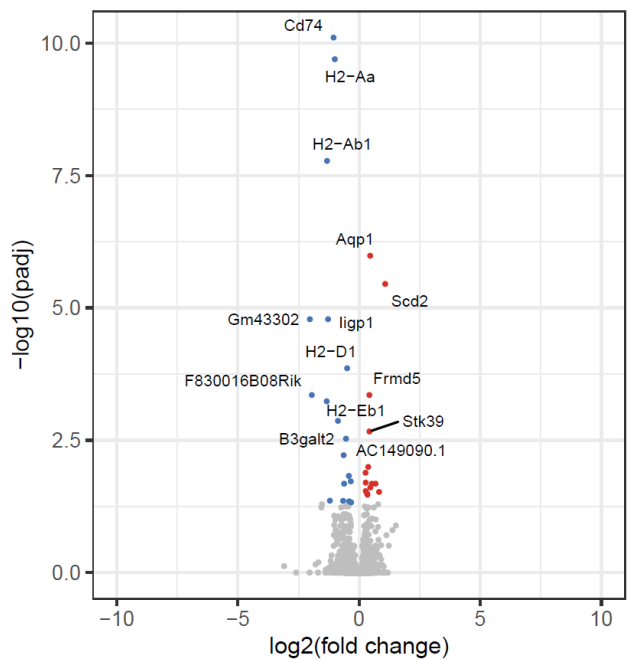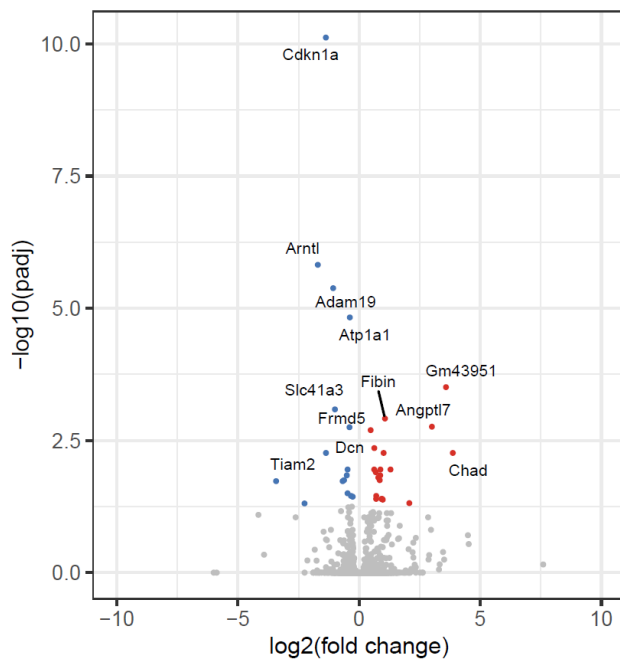

Supplement: mmc4.pdf [file mmc4.pdf]

Figure S5

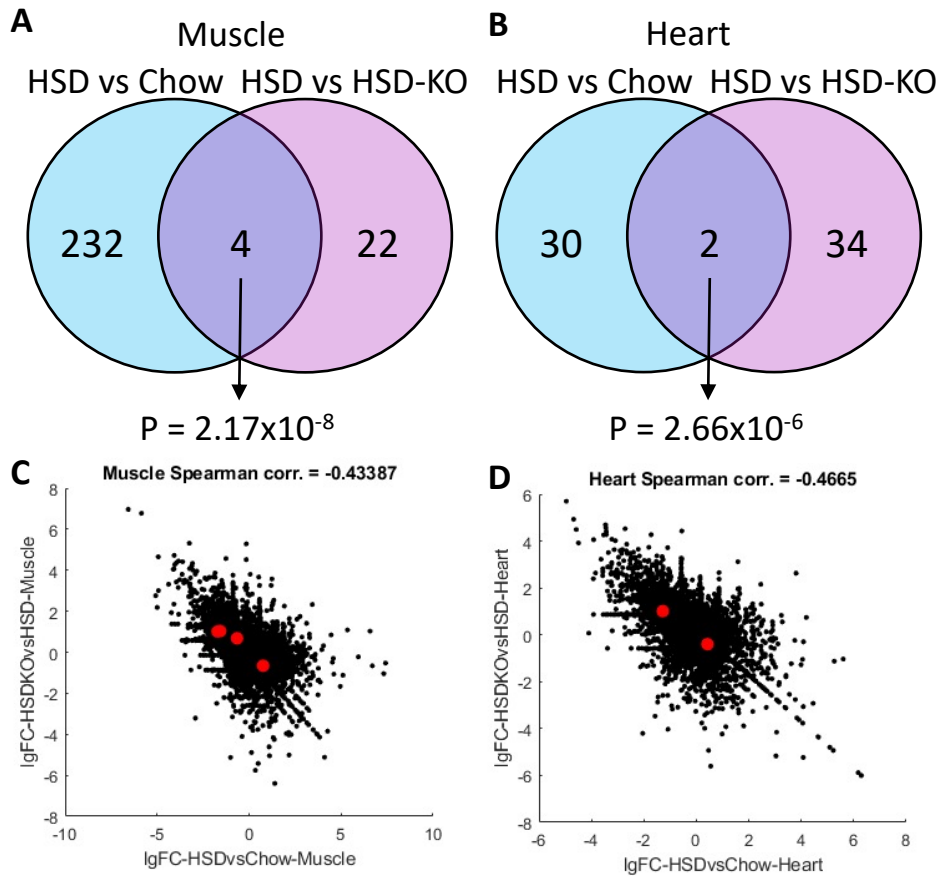

Supplement: mmc6.pdf [file mmc6.pdf]
